# Supplementary material
Source: Springer Nature journal article supplement (https://www.springermedizin.de/resource/supplementary/12877_2014_1032_MOESM1_ESM.pdf/9440966)

**Mean (SD) PAINAD until death**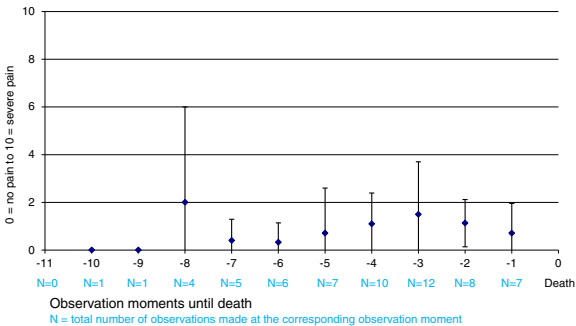**Mean (SD) MMSE until death**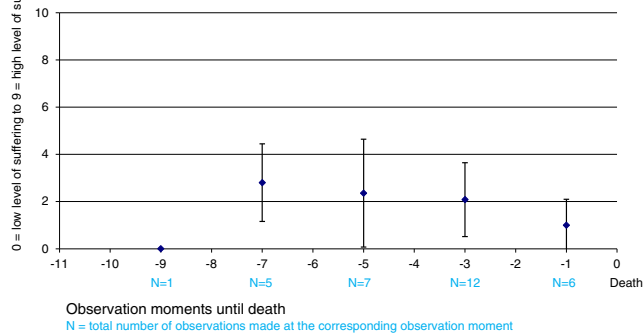**Mean (SD) DS-DAT until death**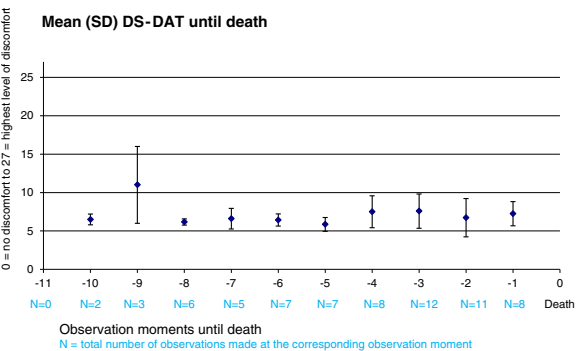**Mean (SD) EOLD-CAD until death**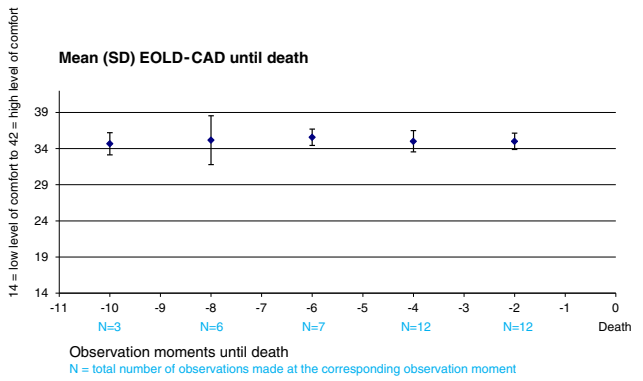

Supplement: MOESM1 [file 9440966]
